# Supplementary material for: Biological Assay to Determine Gonadotropin Potency: From In Vivo to In Vitro Sustainable Method
Source: MDPI journal article supplement (doi:10.3390/ijms24098040), 2023-04-28

Supplementary Materials

**Supplementary Figure S1:** Example dose-response curves for acid enriched variants versus RHS analyzed using A) *in-vitro* and B) *in-vivo* bioassay.

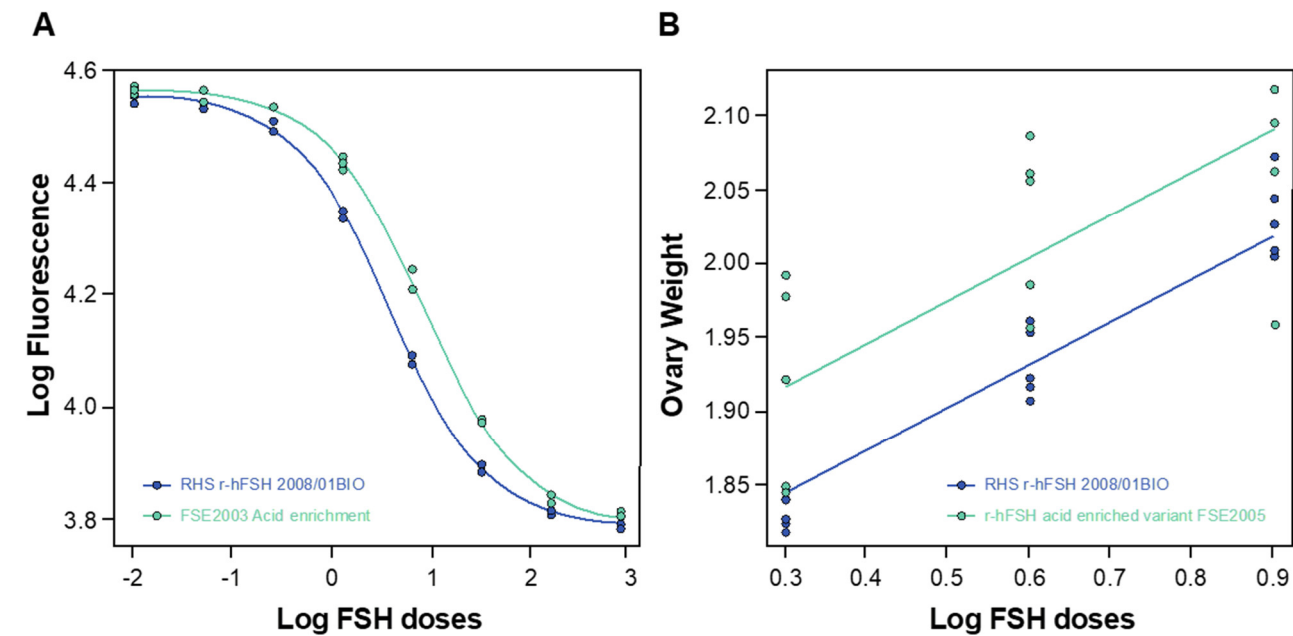

**Supplementary Figure S2:** ANOVA test for significance between untreated and acid enriched samples A) *in-vitro* and B) *in-vivo* assay specific activity.

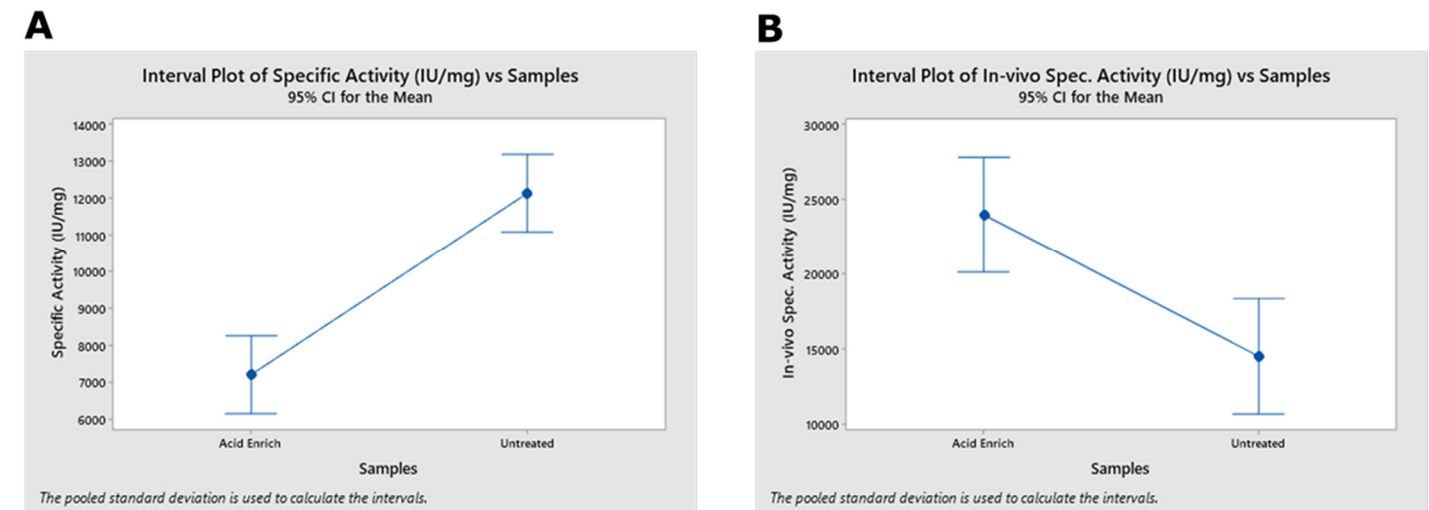

**Supplementary Figure S3:** Example dose-response curves for basic enriched variants versus RHS analyzed using **A)** *in-vitro* and **B)** *in-vivo* bioassay.

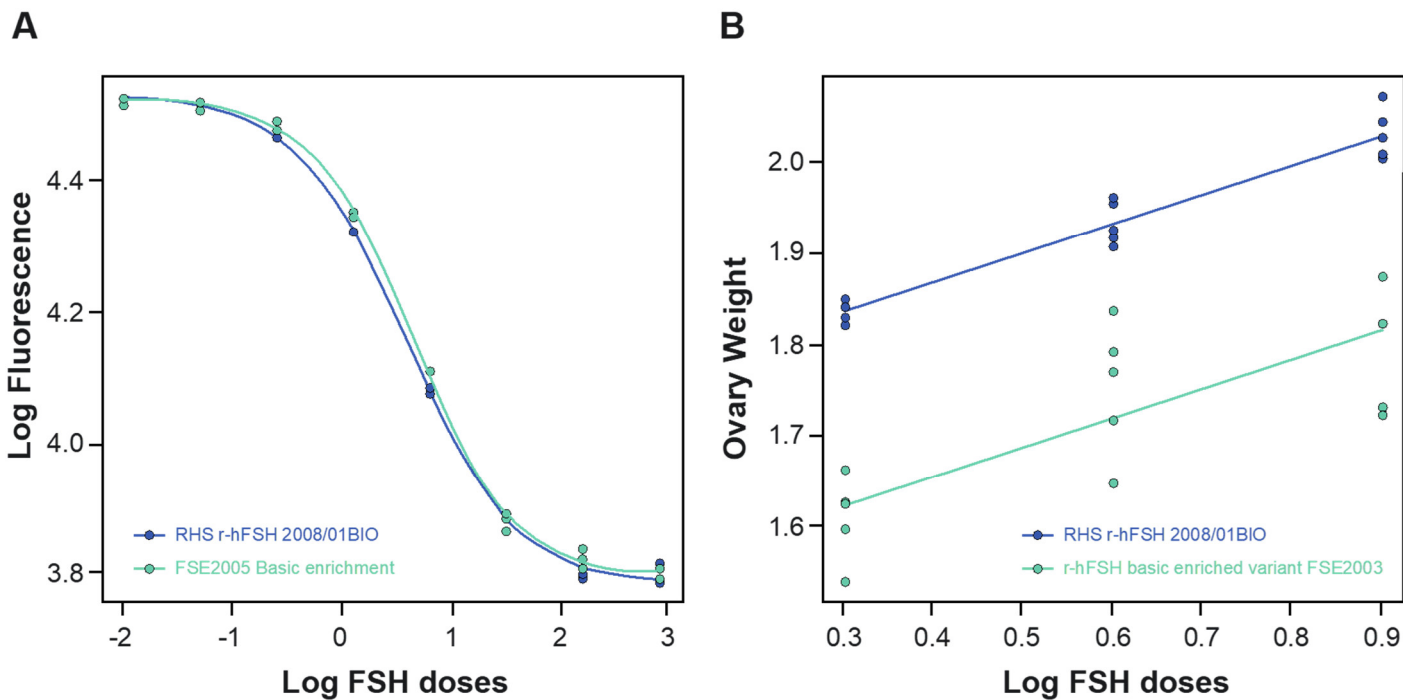

**Supplementary Figure S4:** ANOVA test for significance between untreated and basic enriched samples **A)** *in-vitro* and **B)** *in-vivo* assay specific activity.

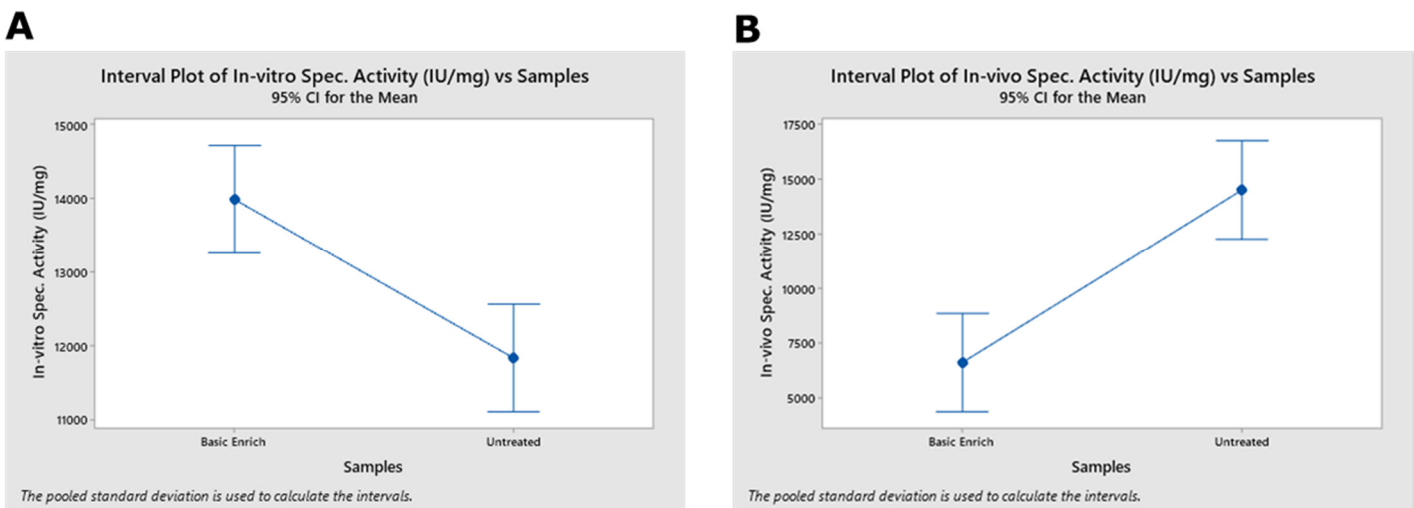

**Supplementary Figure S5:** Example dose-response curves for oxidized variants versus RHS analyzed using **A) *in-vitro*** and **B) *in-vivo*** bioassay.

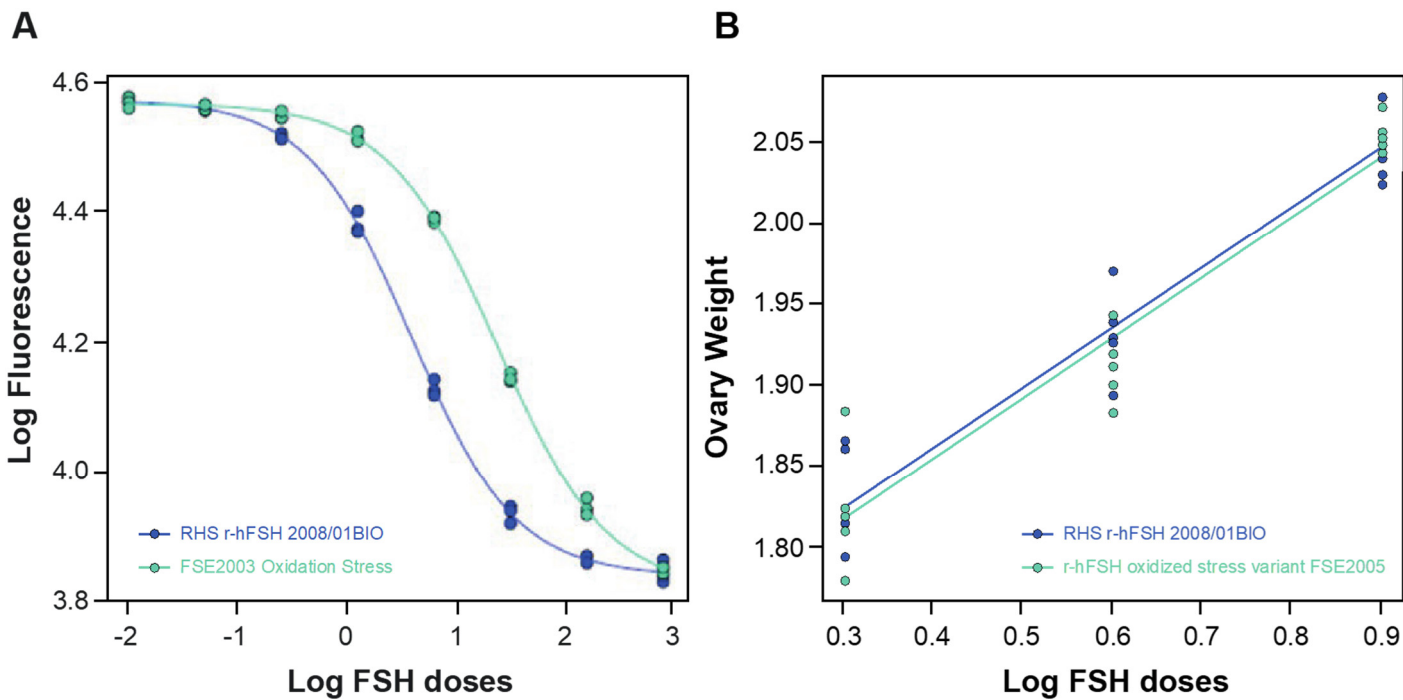

**Supplementary Figure S6:** ANOVA test for significance between untreated and oxidized samples **A) *in-vitro*** and **B) *in-vivo*** assay specific activity.

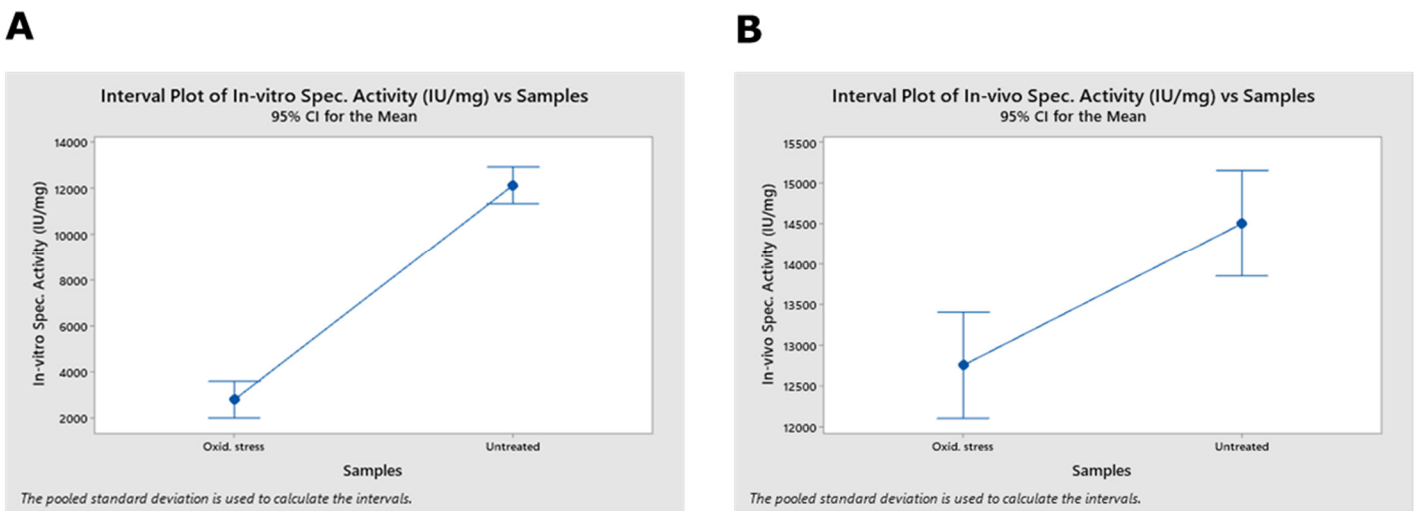

**Supplementary Figure S7:** Example dose-response curves for acid pH stressed variants versus RHS analyzed using **A)** *in-vitro* and **B)** *in-vivo* bioassay.

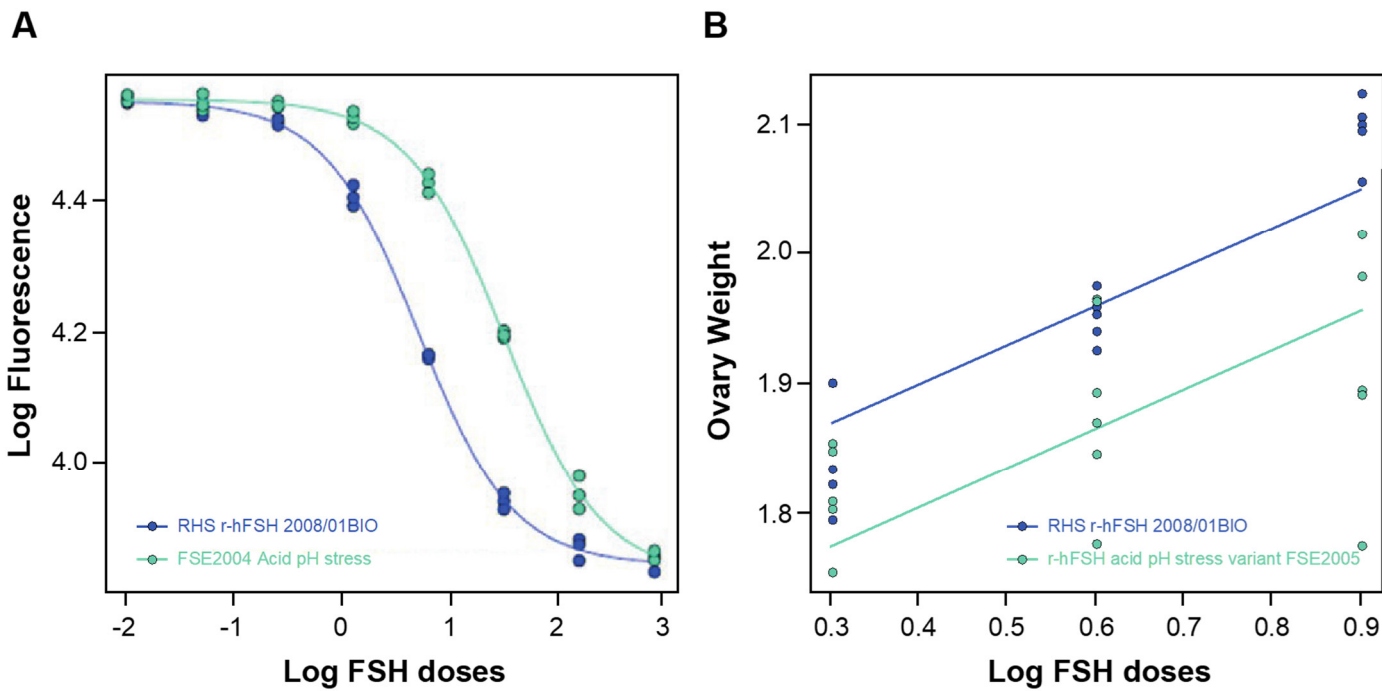

**Supplementary Figure S8:** ANOVA test for significance between untreated and acid pH stressed samples **A)** *in-vitro* and **B)** *in-vivo* assay specific activity.

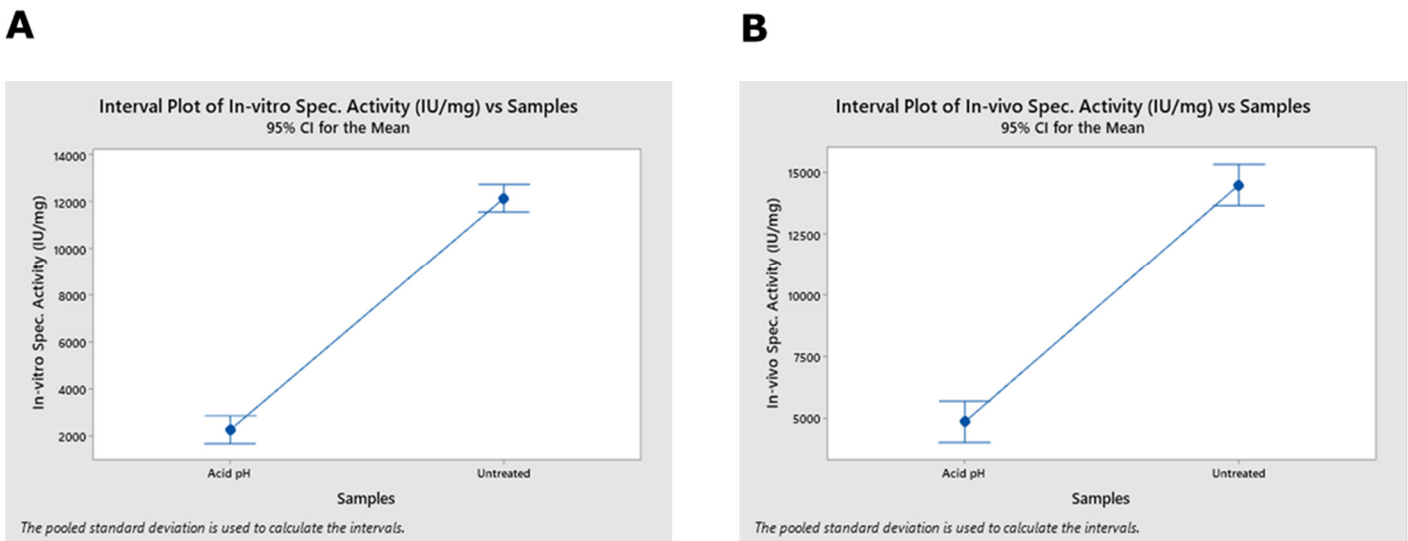

**Supplementary Figure S9:** Example dose-response curves for 100% desialylated FSE2012 **A)** totally desialylated and **B)** untreated FSE2012 versus RHS analyzed using the *in-vitro* bioassay and **C)** 100% desialylated FSE2012 versus RHS analyzed using the *in-vivo* bioassay.

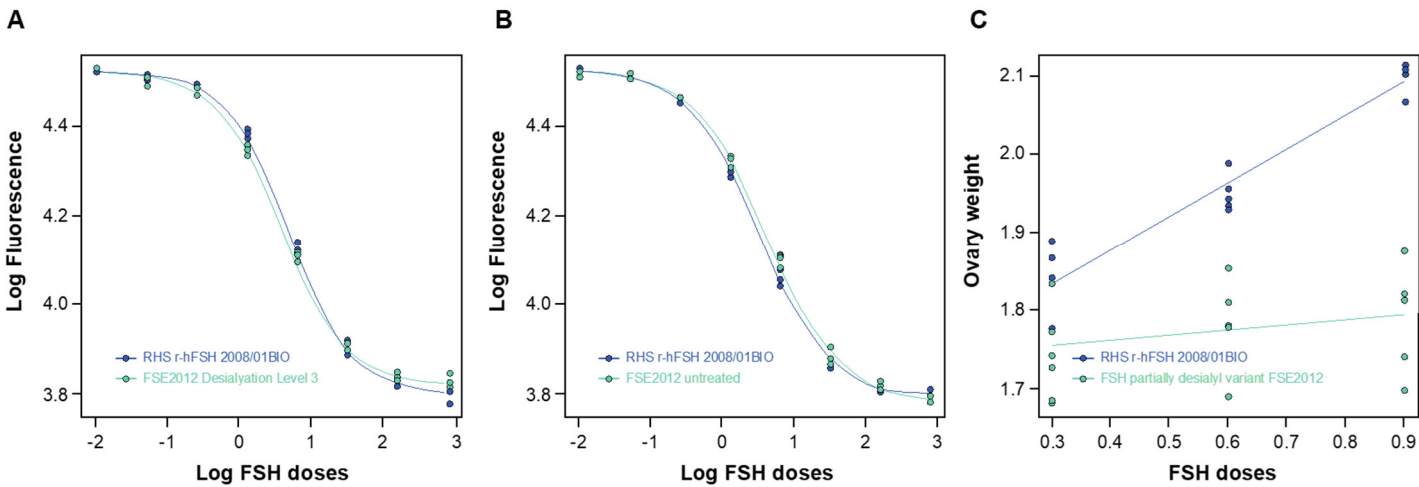

**Supplementary Figure S10:** ANOVA test for significance between untreated and totally desialylated samples **A)** *in-vitro* and **B)** *in-vivo* assay specific activity.

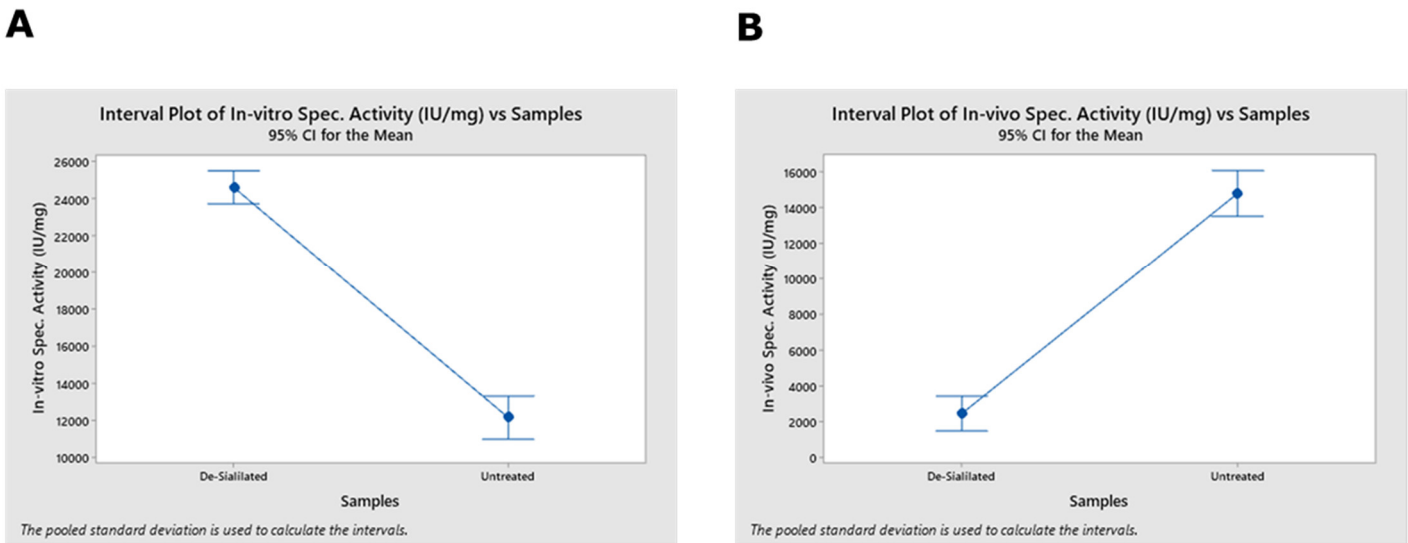

**Supplementary Figure S11:** ANOVA test for significance between untreated and desialylated and degalactosylated samples A) *in-vitro* and B) *in-vivo* assay specific activity.

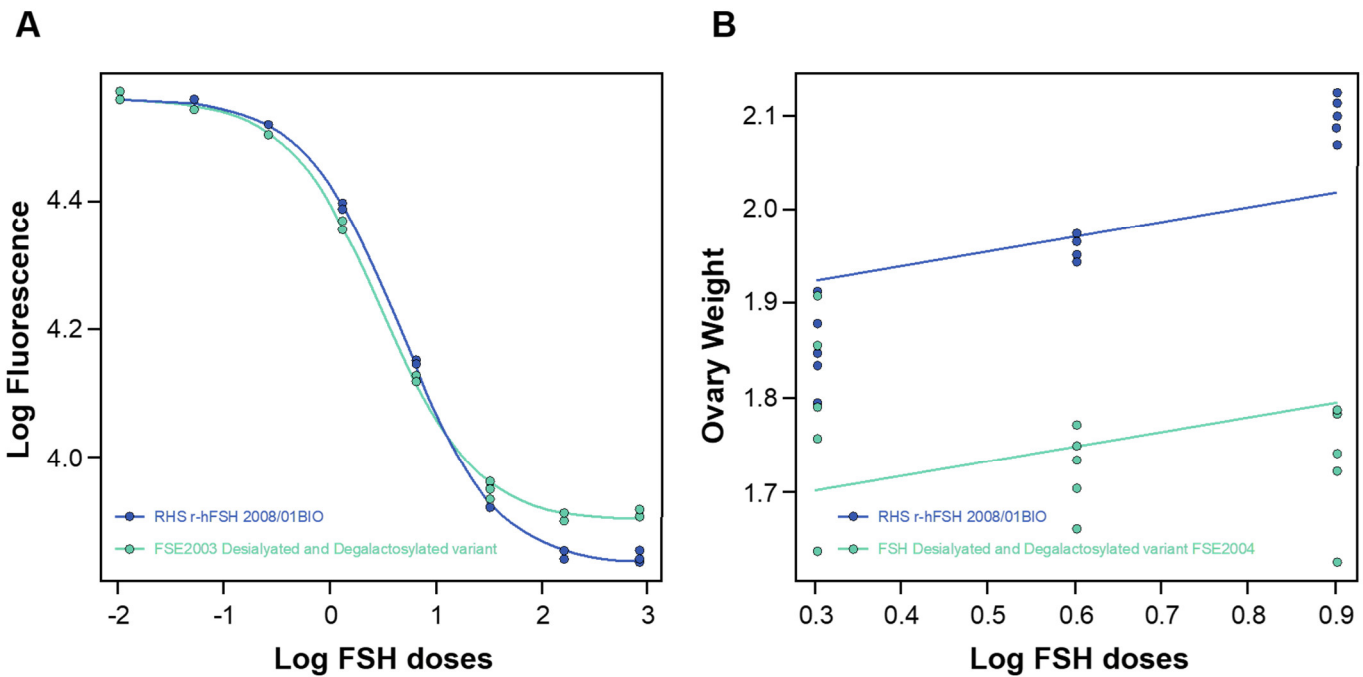

**Supplementary Figure S12:** Example dose-response curves for desialylated and degalactosylated variants versus RHS analyzed using A) *in-vitro* and B) *in-vivo* bioassay.

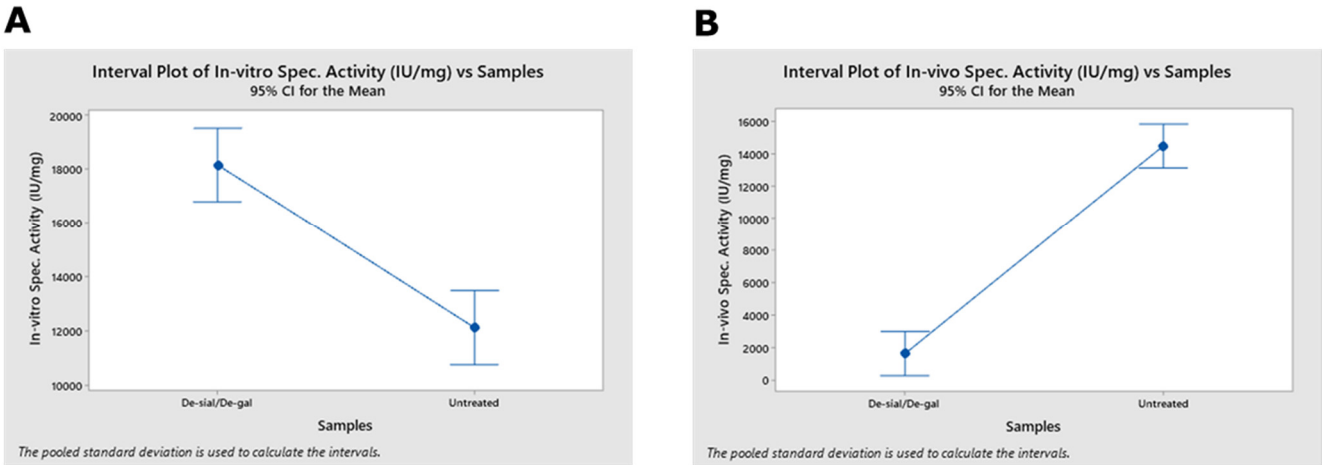

Supplement: s1 [file s1]
